# Supplementary material for: Coupled MoO3−x@CoP heterostructure as a pH-universal electrode for hydrogen generation at a high current density
Source: Royal Society of Chemistry journal article supplement (doi:10.1039/d2dt03551k), 2023-01-01
Supplement: d2dt03551k1.pdf [file d2dt03551k1.pdf]

## Supporting Information

### Coupled $\text{MoO}_{3-x}$ @CoP heterostructure as pH-universal Electrode for Hydrogen Generation at Large Current Density

*Pengzuo Chen, Kaixun Li, Yutong Ye Doufeng Wu\* and Yun Tong\**

Department of Chemistry, Key Laboratory of Surface & Interface Science of Polymer Materials of  
Zhejiang Province, Zhejiang Sci-Tech University, Hangzhou 310018, China

Correspondence and requests for materials should be addressed to Y. Tong (E-mail:  
tongyun@mail.ustc.edu.cn; dfwu@zstu.edu.cn)

## Table of contents

|                                                                                                                                                                                                                                                 |    |
|-------------------------------------------------------------------------------------------------------------------------------------------------------------------------------------------------------------------------------------------------|----|
| <b>Figure S1.</b> The XRD pattern of CoP/NF sample. ....                                                                                                                                                                                        | 3  |
| <b>Figure S2.</b> The XRD pattern of MoO <sub>3-x</sub> /NF sample. ....                                                                                                                                                                        | 3  |
| <b>Figure S3.</b> The Raman spectra of MoO <sub>3-x</sub> /NF sample. ....                                                                                                                                                                      | 4  |
| <b>Figure S4.</b> The XPS survey spectra of MoO <sub>3-x</sub> @CoP/NF samples. ....                                                                                                                                                            | 5  |
| <b>Figure S5.</b> The XPS survey spectra of CoP/NF samples. ....                                                                                                                                                                                | 5  |
| <b>Figure S6.</b> The XPS survey spectra of MoO <sub>3-x</sub> /NF samples. ....                                                                                                                                                                | 6  |
| <b>Figure S7.</b> Nyquist plots for MoO <sub>3-x</sub> @CoP/NF, CoP/NF, MoO <sub>3-x</sub> /NF, CoMo-Pre/NF samples in 1M KOH. ....                                                                                                             | 6  |
| <b>Figure S8.</b> Polarization curves before and after 3000 cycles of MoO <sub>3-x</sub> @CoP/NF for HER in 1 M KOH. ....                                                                                                                       | 7  |
| <b>Figure S9.</b> The cyclic voltammetry curves of (a) CoMo-Pre/NF, (b) CoP/NF, (c) MoO <sub>3-x</sub> /NF and (d) MoO <sub>3-x</sub> @CoP/NF electrodes in 1.0 M KOH recorded at different scan rates from 20 to 100 mV s <sup>-1</sup> . .... | 8  |
| <b>Figure S10.</b> Nyquist plots for MoO <sub>3-x</sub> @CoP/NF, CoP/NF, MoO <sub>3-x</sub> /NF, CoMo-Pre/NF samples in 0.5M H <sub>2</sub> SO <sub>4</sub> . ....                                                                              | 9  |
| <b>Figure S11.</b> (a-b) corresponding Bode plots for MoO <sub>3-x</sub> @CoP/NF, CoP/NF, MoO <sub>3-x</sub> /NF, CoMo-Pre/NF samples 0.5M H <sub>2</sub> SO <sub>4</sub> . ....                                                                | 9  |
| <b>Figure S12.</b> Polarization curves before and after 3000 cycles of MoO <sub>3-x</sub> @CoP/NF for HER in 0.5M H <sub>2</sub> SO <sub>4</sub> . ....                                                                                         | 10 |
| <b>Figure S13.</b> Nyquist plots for MoO <sub>3-x</sub> @CoP/NF, CoP/NF, MoO <sub>3-x</sub> /NF, CoMo-Pre/NF samples in 1 M PBS. ....                                                                                                           | 10 |
| <b>Figure S14.</b> (a-b) corresponding Bode plots for MoO <sub>3-x</sub> @CoP/NF, CoP/NF, MoO <sub>3-x</sub> /NF, CoMo-Pre/NF samples in 1M PBS. ....                                                                                           | 11 |
| <b>Figure S15.</b> Polarization curves before and after 3000 cycles of MoO <sub>3-x</sub> @CoP/NF for HER in 1 M PBS. ....                                                                                                                      | 11 |

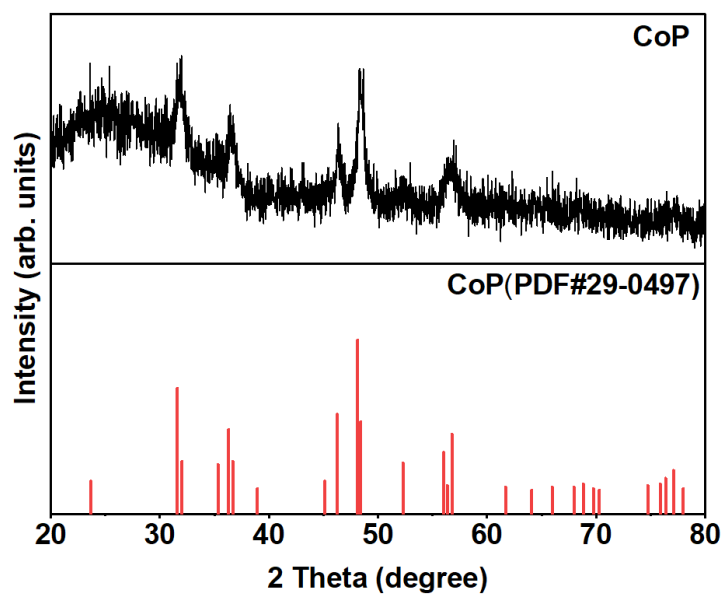

**Figure S1.** The XRD pattern of CoP/NF sample.

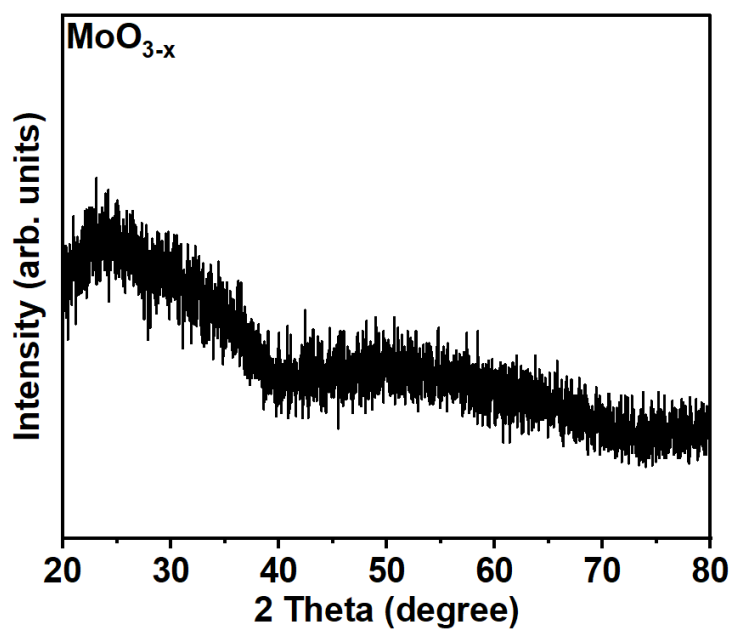

**Figure S2.** The XRD pattern of MoO<sub>3-x</sub>/NF sample.

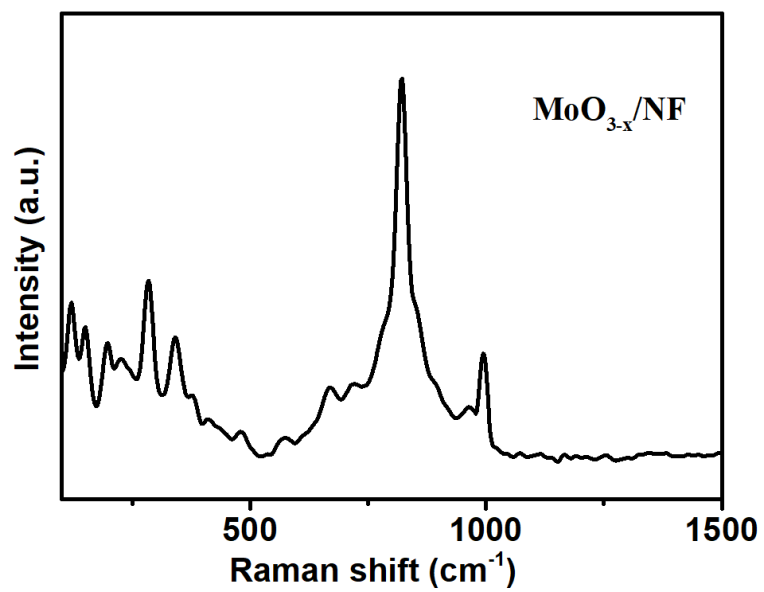

**Figure S3.** The Raman spectra of  $\text{MoO}_{3-x}/\text{NF}$  sample.

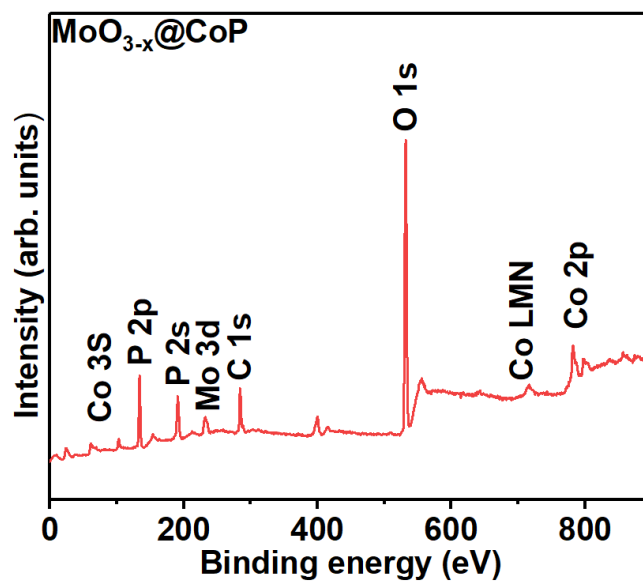

**Figure S4.** The XPS survey spectra of MoO<sub>3-x</sub>@CoP/NF samples.

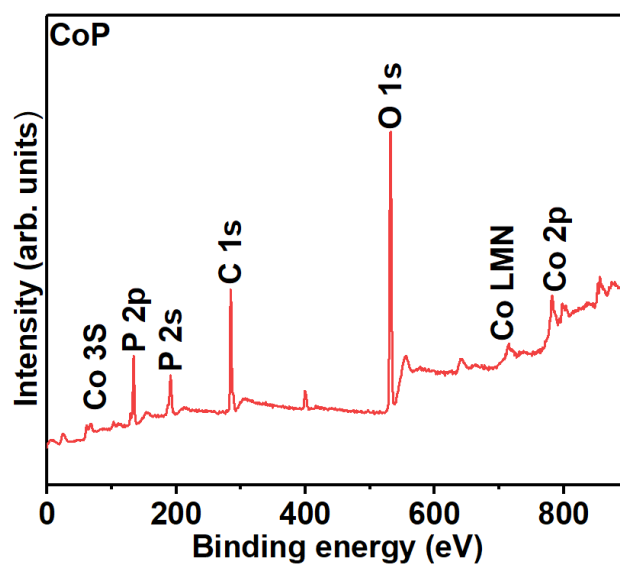

**Figure S5.** The XPS survey spectra of CoP/NF samples.

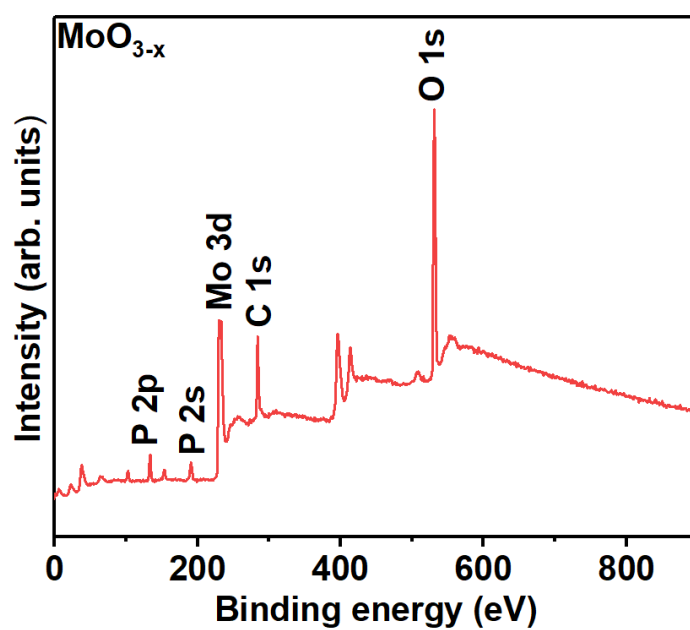

**Figure S6.** The XPS survey spectra of MoO<sub>3-x</sub>/NF samples.

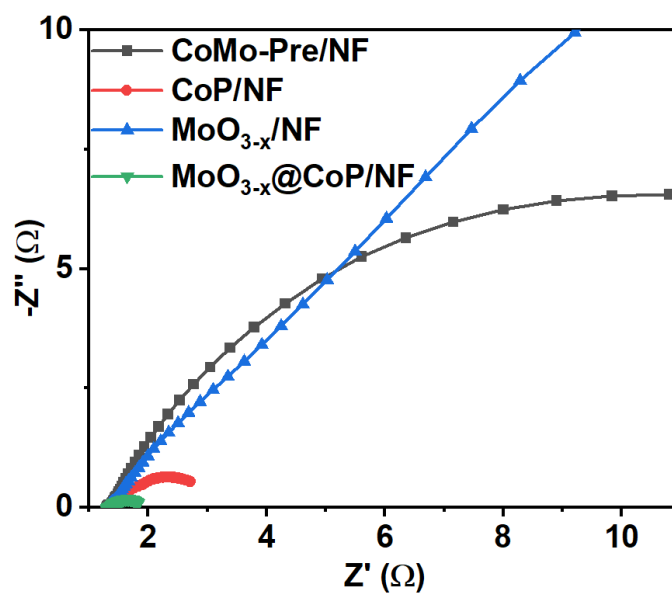

**Figure S7.** Nyquist plots for MoO<sub>3-x</sub>@CoP/NF, CoP/NF, MoO<sub>3-x</sub>/NF, CoMo-Pre/NF samples in 1M KOH.

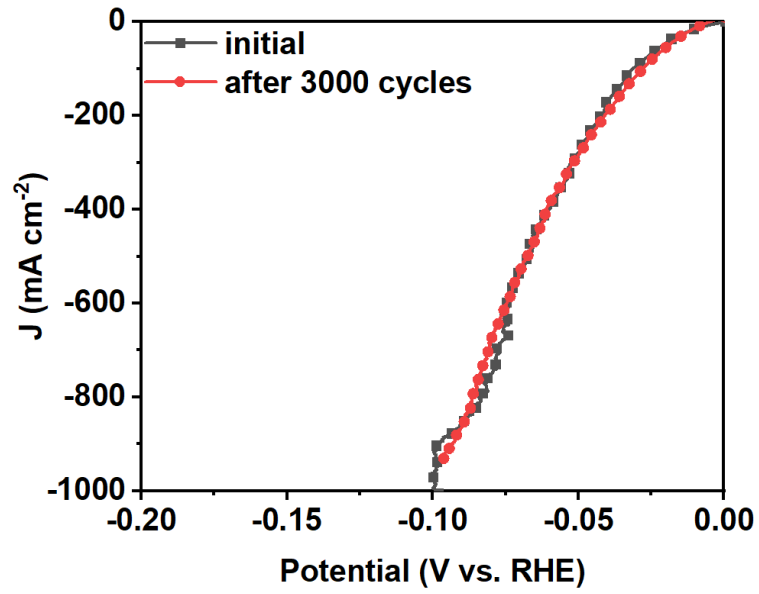

**Figure S8.** Polarization curves before and after 3000 cycles of MoO<sub>3-x</sub>@CoP/NF for HER in 1 M KOH.

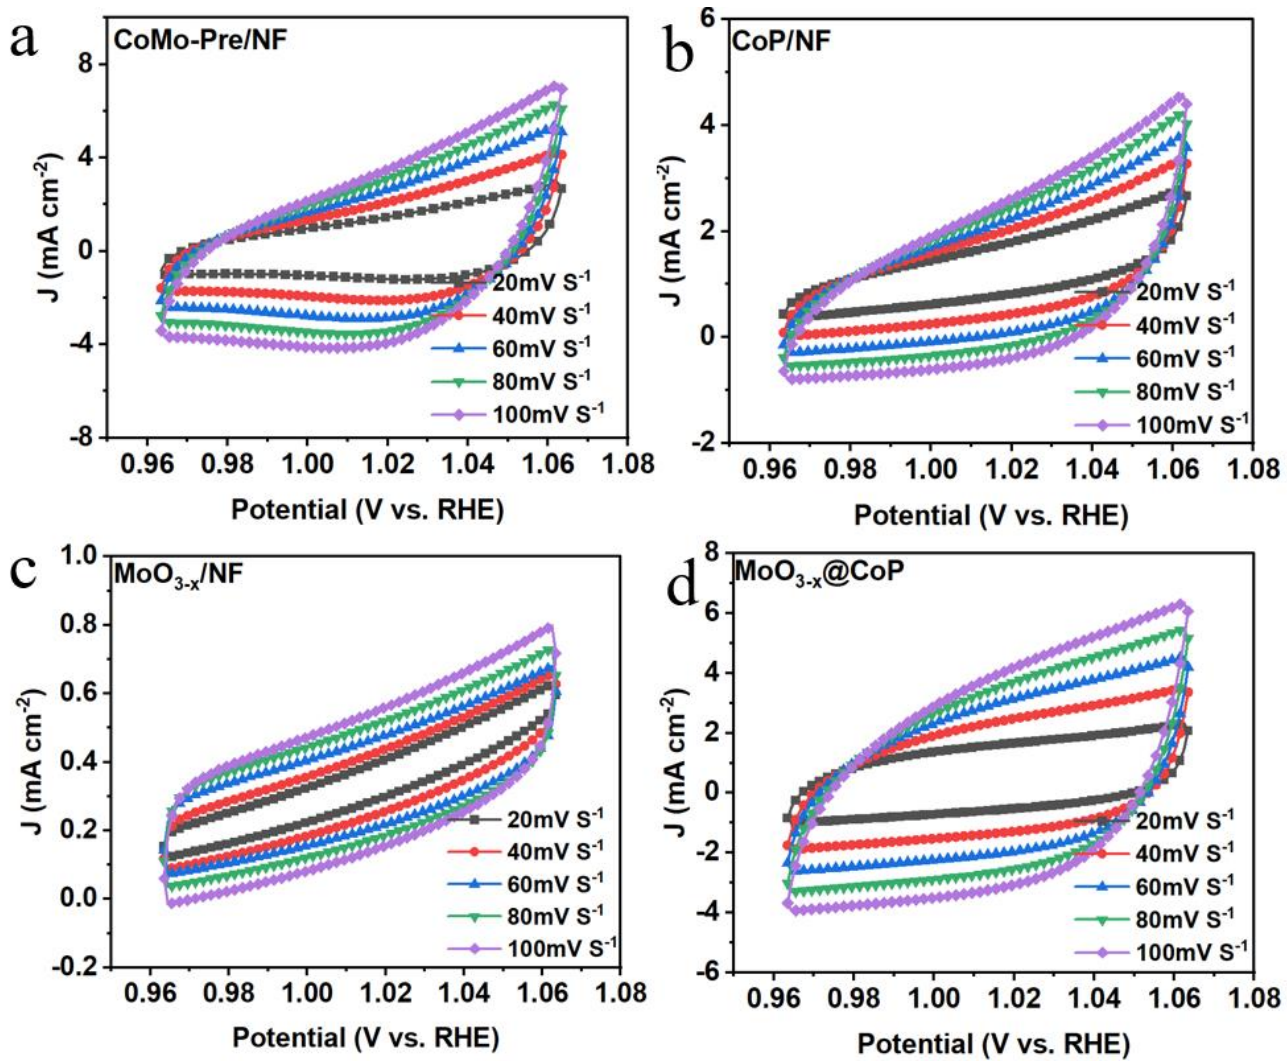

**Figure S9.** The cyclic voltammetry curves of (a) CoMo-Pre/NF, (b) CoP/NF, (c) MoO<sub>3-x</sub>/NF and (d) MoO<sub>3-x</sub>@CoP/NF electrodes in 1.0 M KOH recorded at different scan rates from 20 to 100 mV s<sup>-1</sup>.



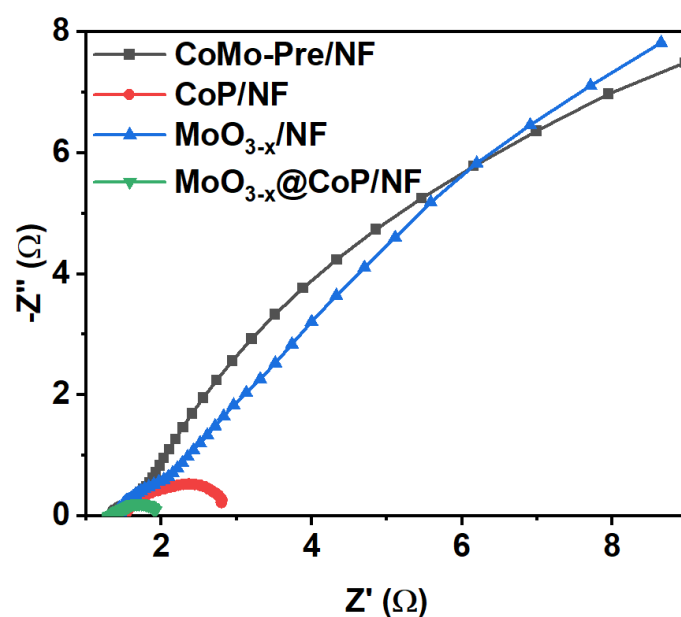

**Figure S10.** Nyquist plots for MoO<sub>3-x</sub>@CoP/NF, CoP/NF, MoO<sub>3-x</sub>/NF, CoMo-Pre/NF samples in 0.5M H<sub>2</sub>SO<sub>4</sub>.

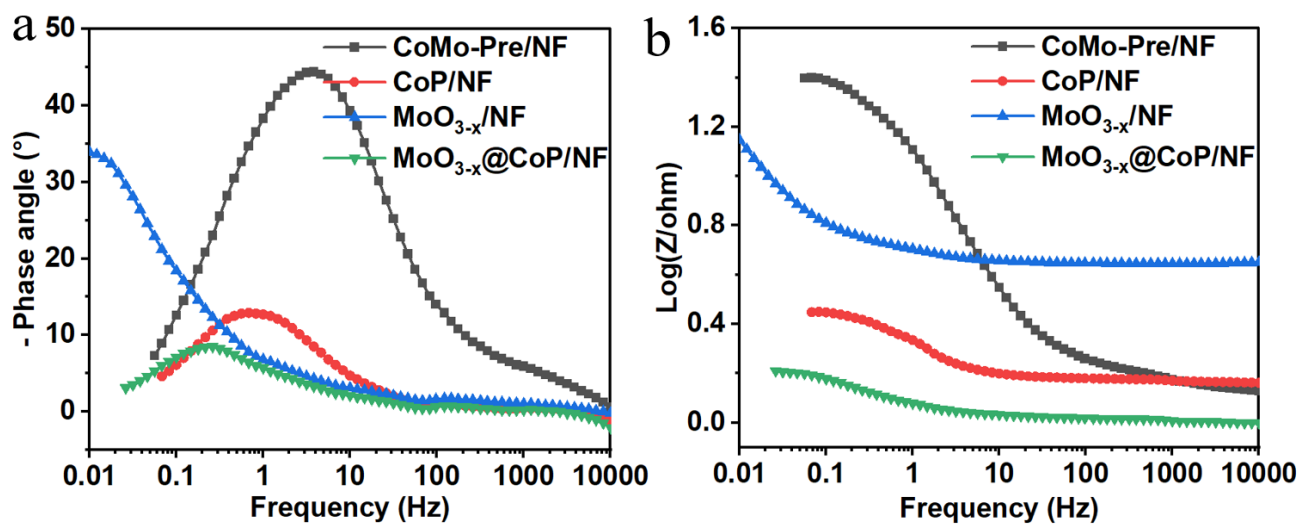

**Figure S11.** (a-b) corresponding Bode plots for MoO<sub>3-x</sub>@CoP/NF, CoP/NF, MoO<sub>3-x</sub>/NF, CoMo-Pre/NF samples 0.5M H<sub>2</sub>SO<sub>4</sub>.

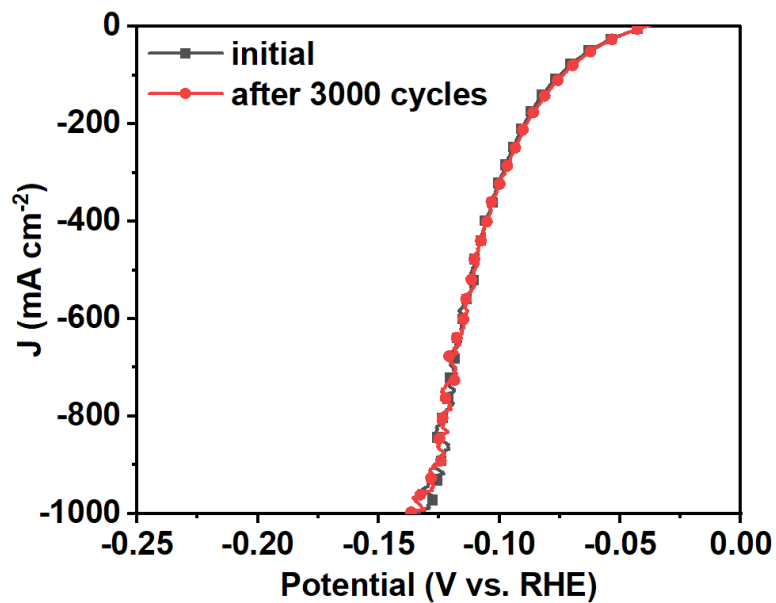

**Figure S12.** Polarization curves before and after 3000 cycles of  $\text{MoO}_{3-x}\text{@CoP/NF}$  for HER in 0.5M  $\text{H}_2\text{SO}_4$ .

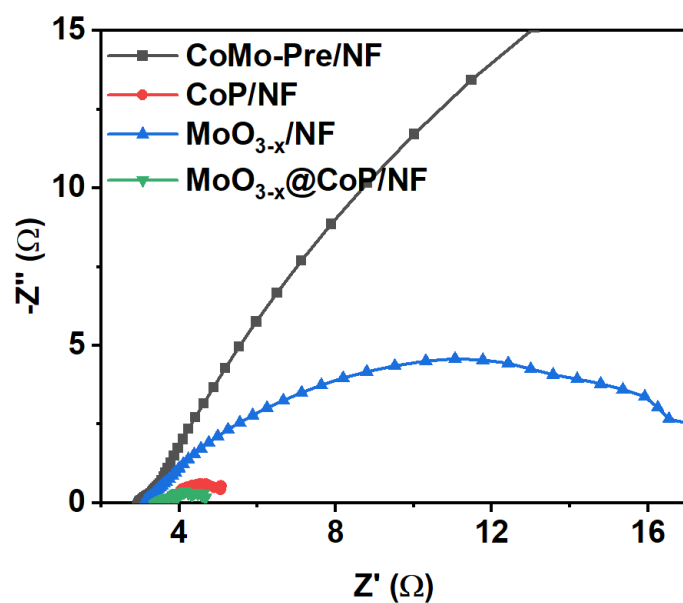

**Figure S13.** Nyquist plots for  $\text{MoO}_{3-x}\text{@CoP/NF}$ ,  $\text{CoP/NF}$ ,  $\text{MoO}_{3-x}\text{/NF}$ ,  $\text{CoMo-Pre/NF}$  samples in 1 M PBS.

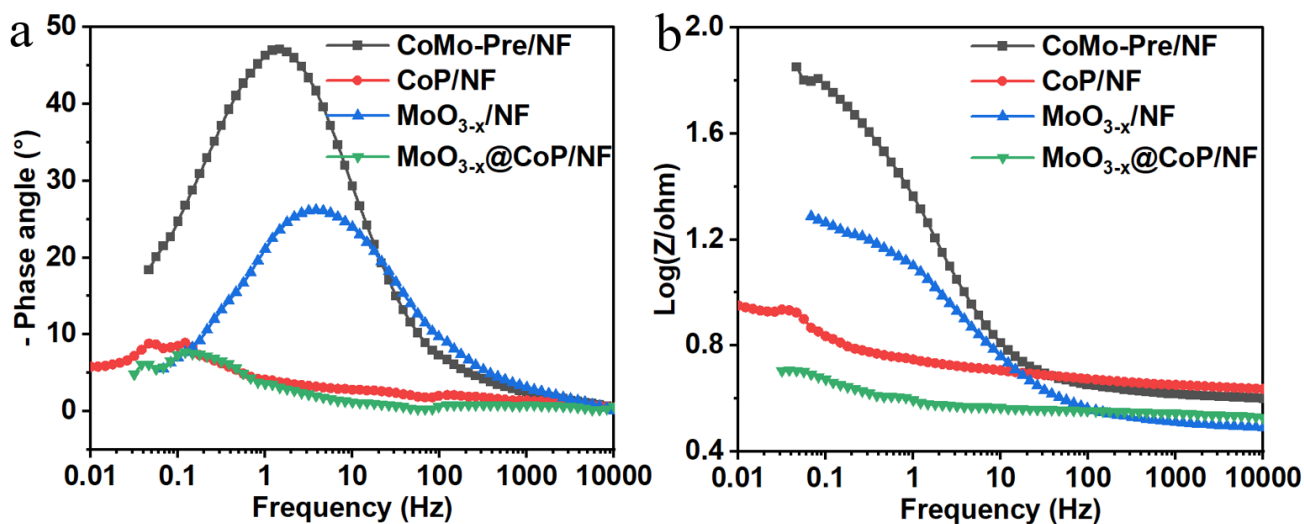

**Figure S14.** (a-b) corresponding Bode plots for MoO<sub>3-x</sub>@CoP/NF, CoP/NF, MoO<sub>3-x</sub>/NF, CoMo-Pre/NF samples in 1M PBS.

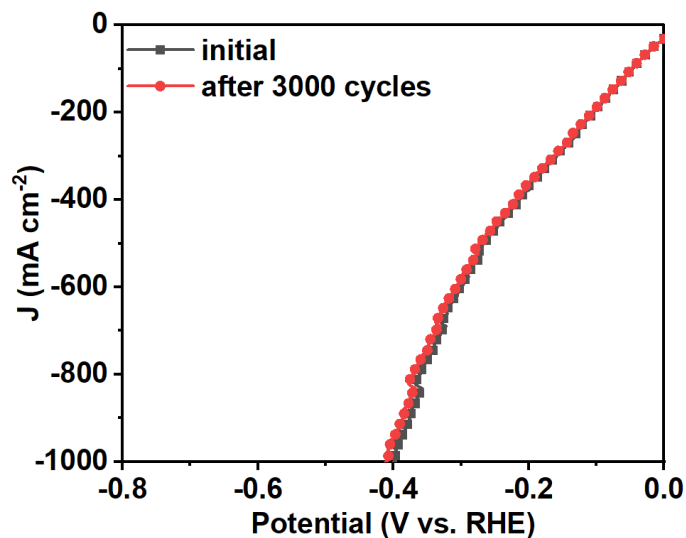

**Figure S15.** Polarization curves before and after 3000 cycles of MoO<sub>3-x</sub>@CoP/NF for HER in 1 M PBS.
